# Supplementary material for: Rational design of multi-functional thermally activated delayed fluorescence emitters for both sensor and OLED applications
Source: Royal Society of Chemistry journal article supplement (doi:10.1039/d2nj00770c), 2022-01-01
Supplement: d2nj00770c1.pdf [file d2nj00770c1.pdf]

## Supporting Information

### Rational design of multi-functional Thermally Activated Delayed Fluorescence emitter for both sensor and OLED applications

Aiyun Zhu <sup>a†</sup>, Jianmin Yu <sup>a†</sup>, Tao Zhou <sup>a</sup>, Kaizhi Zhang <sup>a</sup>, Suyu Qiu <sup>a</sup>, Xinxin Ban <sup>a,c\*</sup>, Yuanchu Wang, Zhouzhou Shen, Shiji Da, Xuzhu Gao <sup>b\*</sup>

<sup>a</sup> School of Environmental and Chemical Engineering, Jiangsu Ocean University, Lianyungang, Jiangsu, 222005, China

<sup>b</sup> Department of Central Laboratory, The Second People's Hospital of Lianyungang City (Cancer Hospital of Lianyungang)

<sup>c</sup> Jiangsu Key Laboratory of Function Control Technology for Advanced Materials, Lianyungang, Jiangsu, 222005, China

<sup>†</sup> Aiyun Zhu and Jianmin Yu contributed equally to this work.

\*Corresponding Authors Email: [banxx@jou.edu.cn](mailto:banxx@jou.edu.cn) (Xinxin Ban); [alexgwan@163.com](mailto:alexgwan@163.com) (Xuzhu Gao)

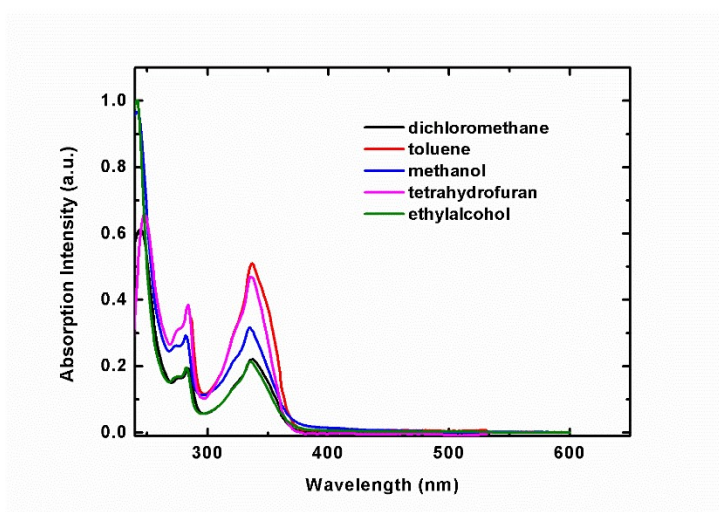

**Figure S1.** UV-vis absorption of CzSO-2CO at different solvents and with different ions.

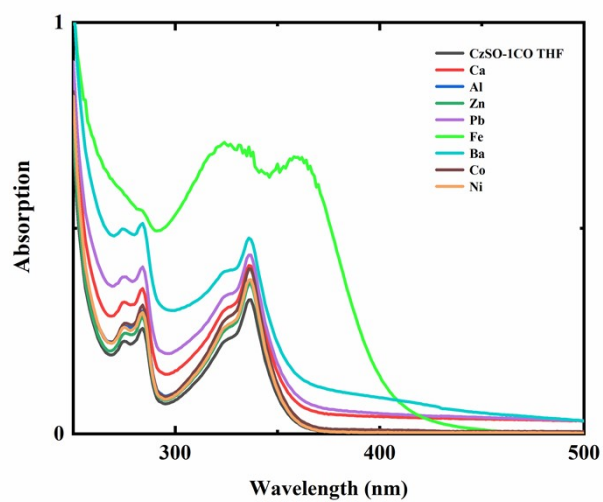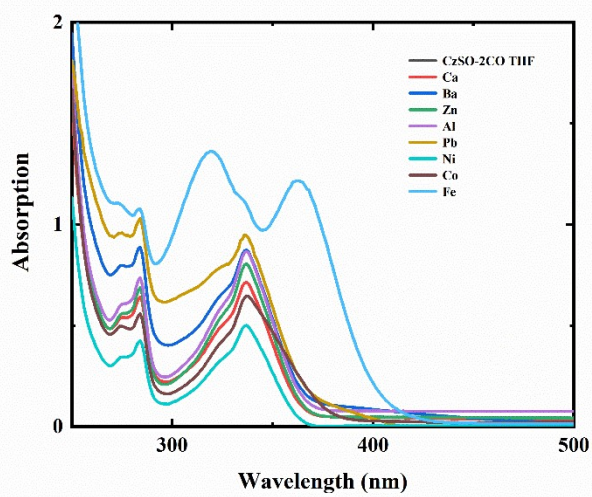

**Figure S2.** UV-vis absorption of CzSO-1CO and CzSO-2CO with different ions.

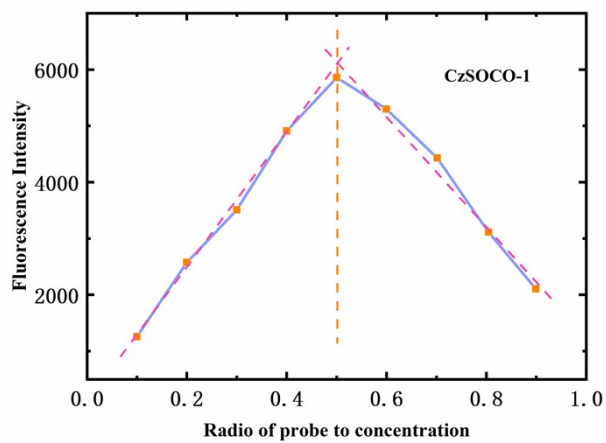

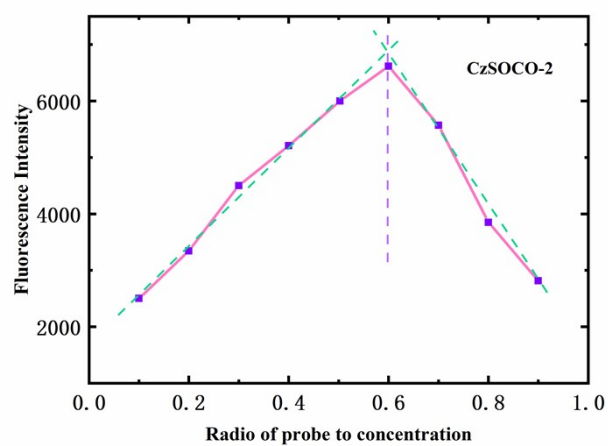

**Figure S3.** Job's plot curve of CzSO-1CO (a) and CzSO-2CO (b).

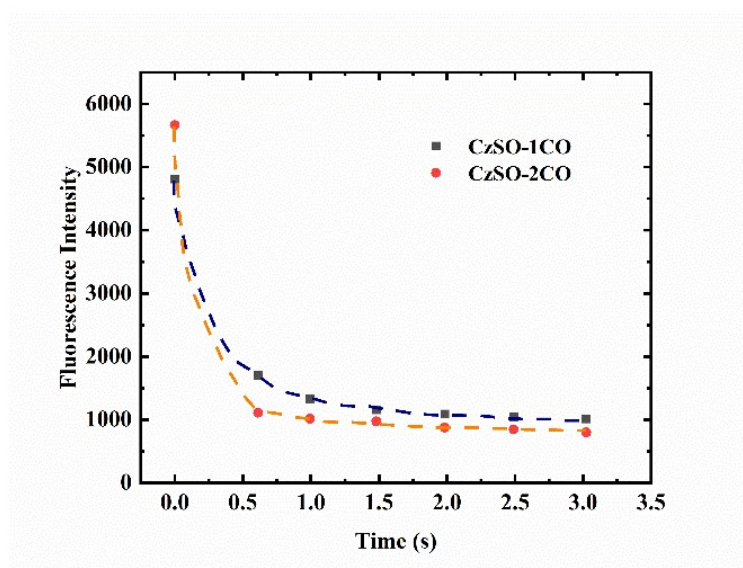

**Figure S4.** Response time fitting of fluorescence intensity at 488 nm.

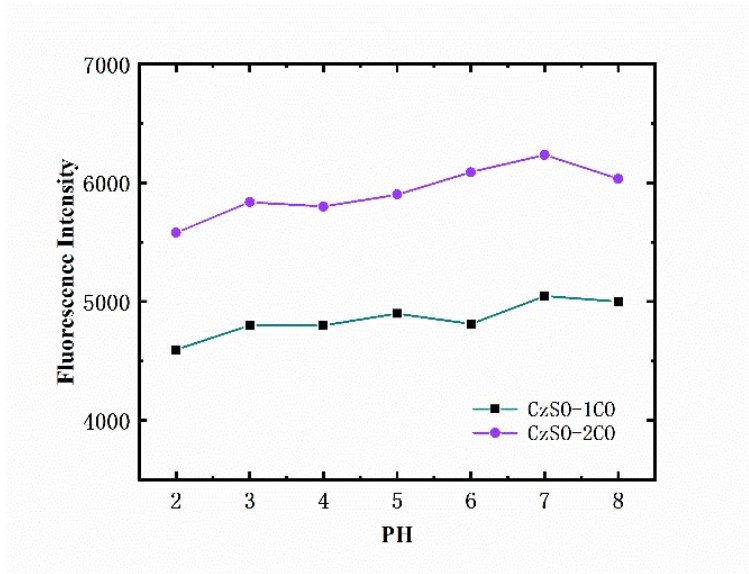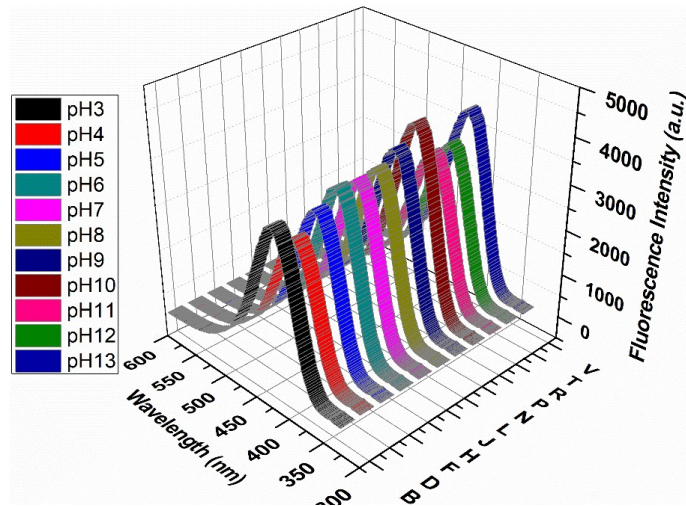

Figure S5. Fluorescence spectra changes with advancing pH values;

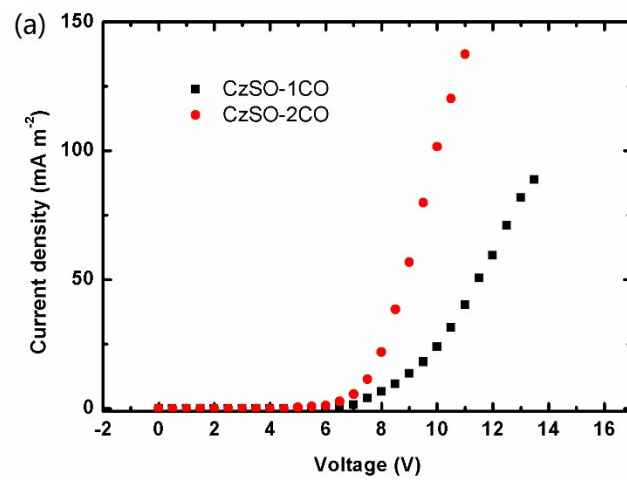

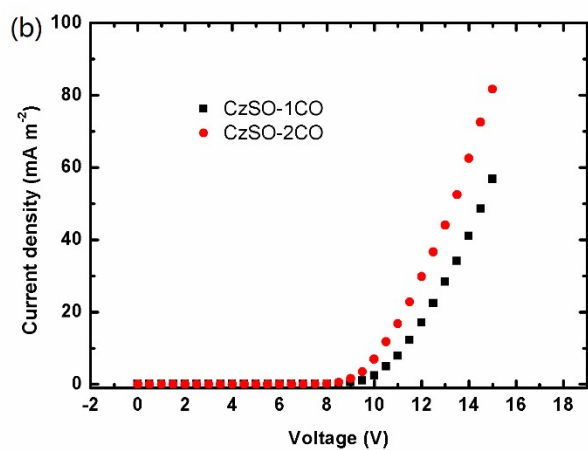

**Figure S6.** Current density–voltage (J–V) characteristics of hole-only (a) and electron-only (b) devices.

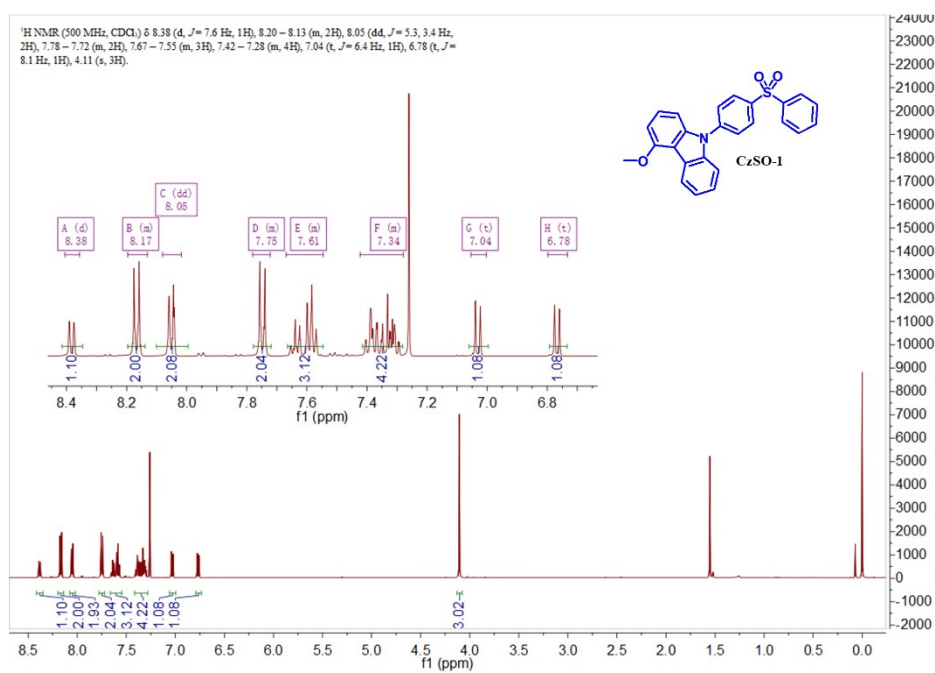

**Figure S7.** <sup>1</sup>H-NMR spectrum of CzSO-1.

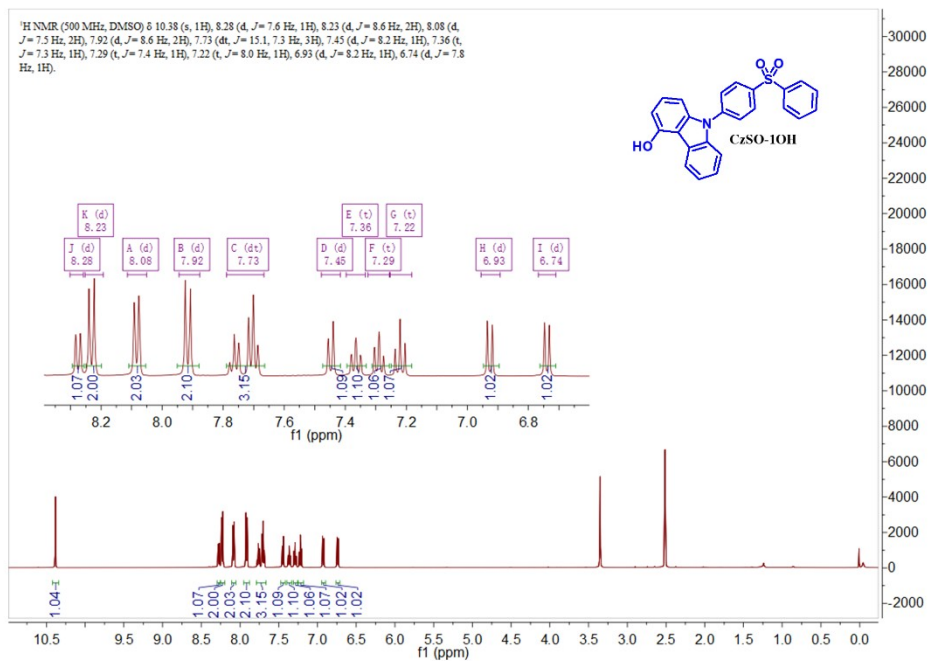

Figure S8. <sup>1</sup>H-NMR spectrum of CzSO-1OH.

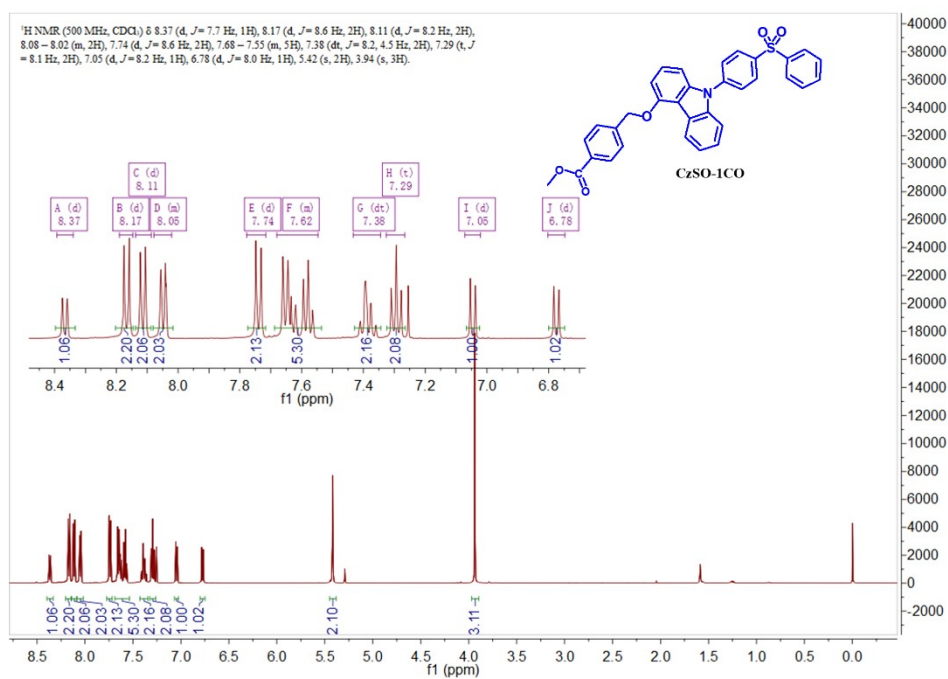

Figure S9. <sup>1</sup>H-NMR spectrum of CzSO-1CO.



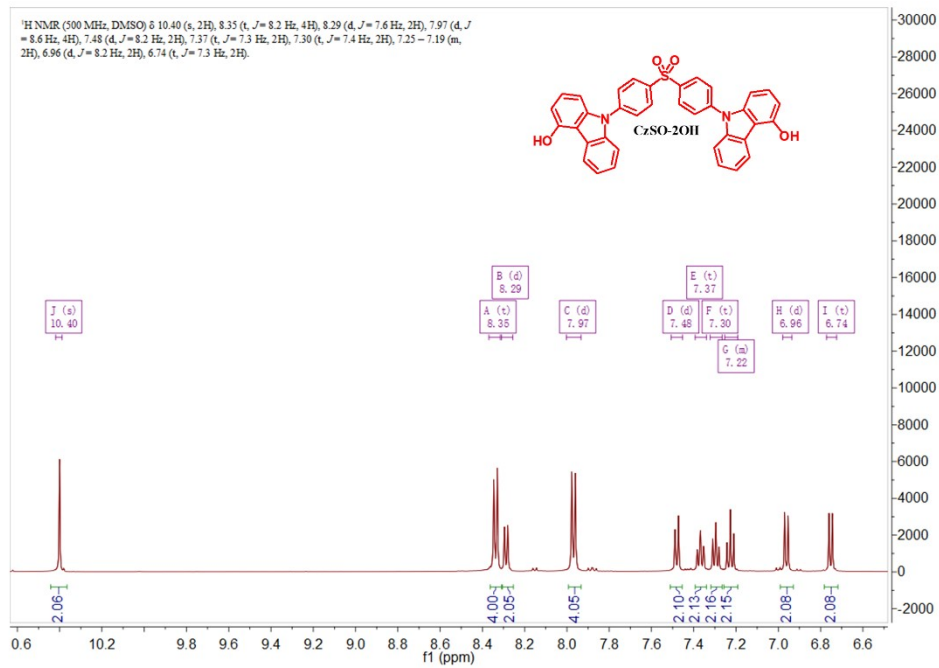

**Figure S10.** <sup>1</sup>H-NMR spectrum of CzSO-2OH.

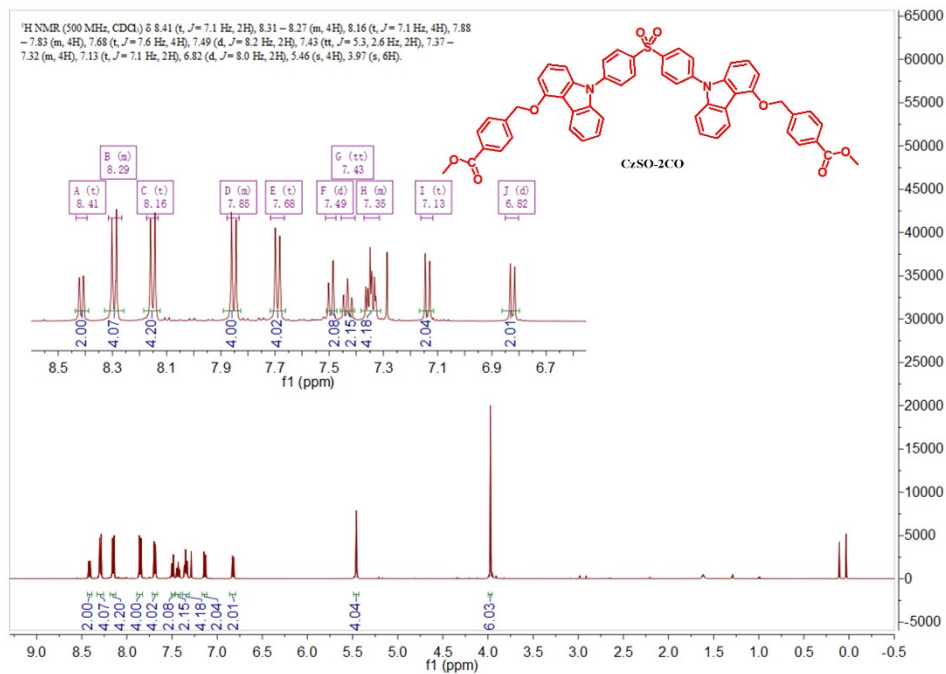

**Figure S11.** <sup>1</sup>H-NMR spectrum of CzSO-2CO.

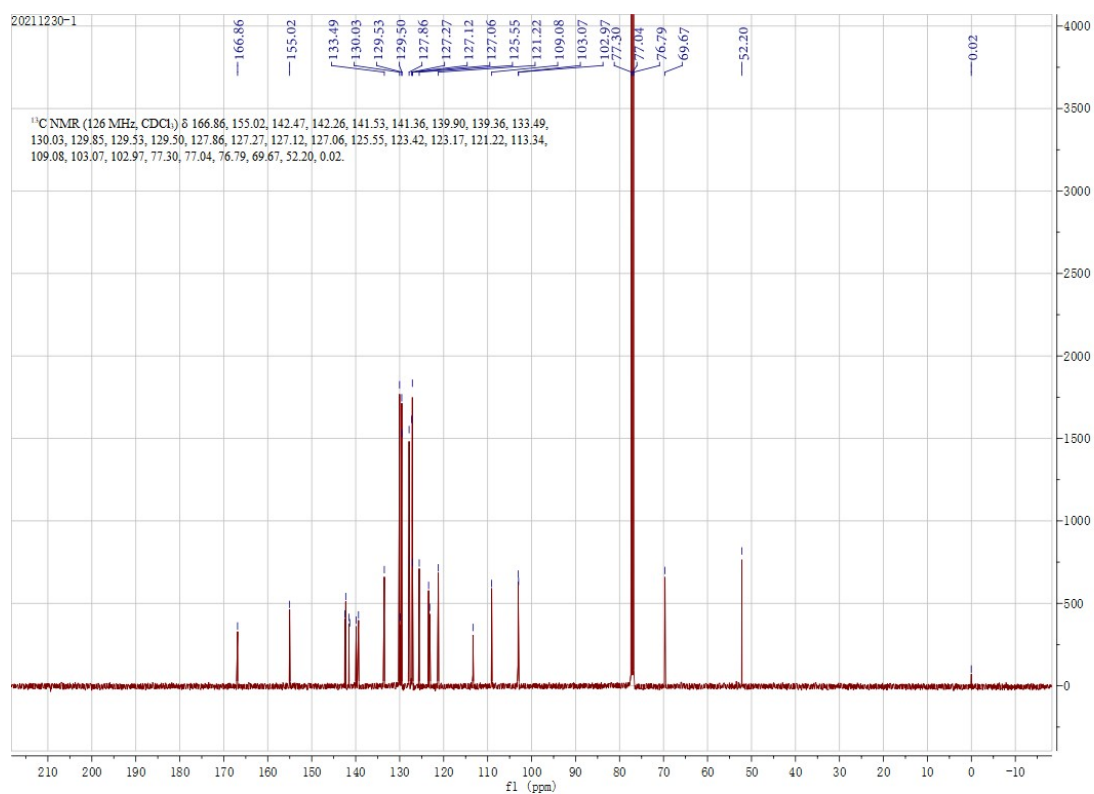

**Figure S12.**  $^{13}\text{C}$ -NMR spectrum of CzSO-1CO.

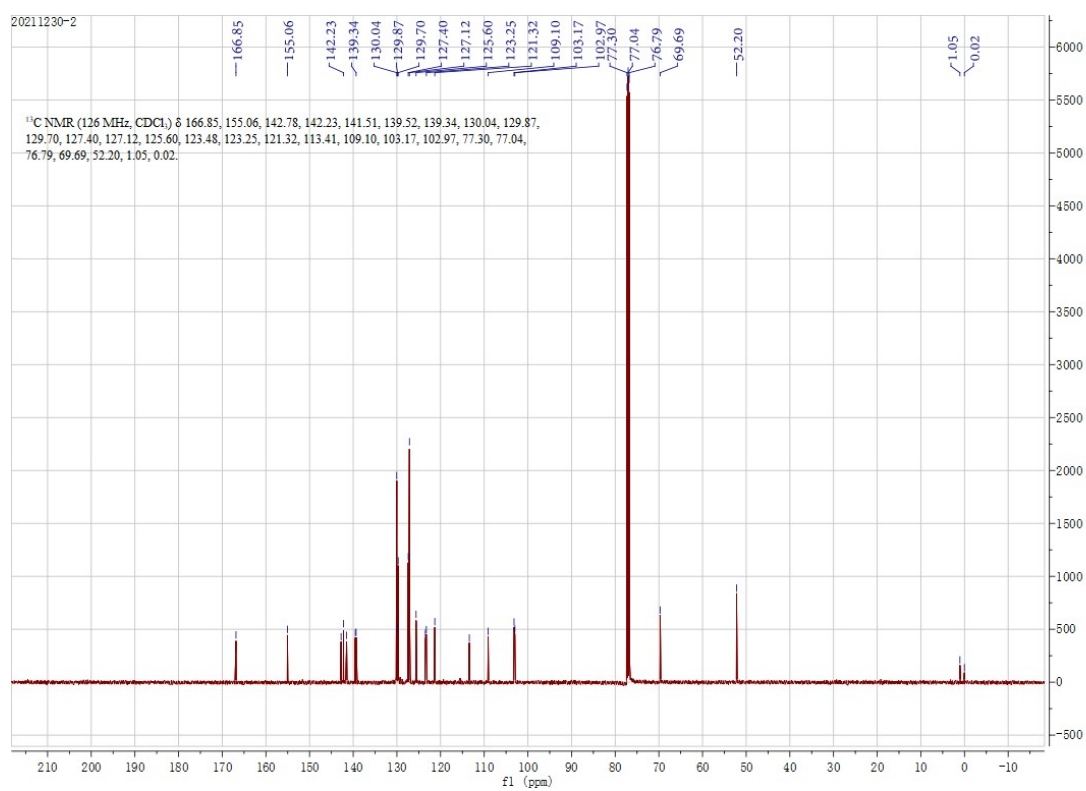

**Figure S13.**  $^{13}\text{C}$ -NMR spectrum of CzSO-2CO.
